# Supplementary material for: A high-performance lignin flow fuel cell based on self-generating electricity of lignin at low temperature via a privileged structure and redox chemistry
Source: Royal Society of Chemistry journal article supplement (doi:10.1039/d3gc04428a), 2023-12-23
Supplement: d3gc04428a2.pdf [file d3gc04428a2.pdf]

## Supporting Information

### High performance lignin flow fuel cell based on self-generating electricity of lignin at low temperature via privileged structure and redox chemistry

Zixin Xie,<sup>a</sup> Xihong Zu,<sup>\*a,b</sup> Jinxin Lin,<sup>a</sup> Xueqing Qiu,<sup>\*a,b</sup> Tengda Liang<sup>a</sup> and Liheng Chen<sup>a,b</sup>

<sup>a</sup> *Guangdong Provincial Key Laboratory of Plant Resources Biorefinery, School of Chemical Engineering and Light Industry, Guangdong University of Technology, Guangzhou, 510006, China*

<sup>b</sup> *Jieyang Branch of Chemistry and Chemical Engineering Guangdong Laboratory, Jieyang 515200, China.*

**\*Corresponding Authors:** Prof. Xihong Zu, Prof. Xueqing Qiu

**E-mail address:** [xhzu@gdut.edu.cn](mailto:xhzu@gdut.edu.cn) (X. Zu), [cexqqiu@scut.edu.cn](mailto:cexqqiu@scut.edu.cn) (X. Qiu).

## Supplementary Figures

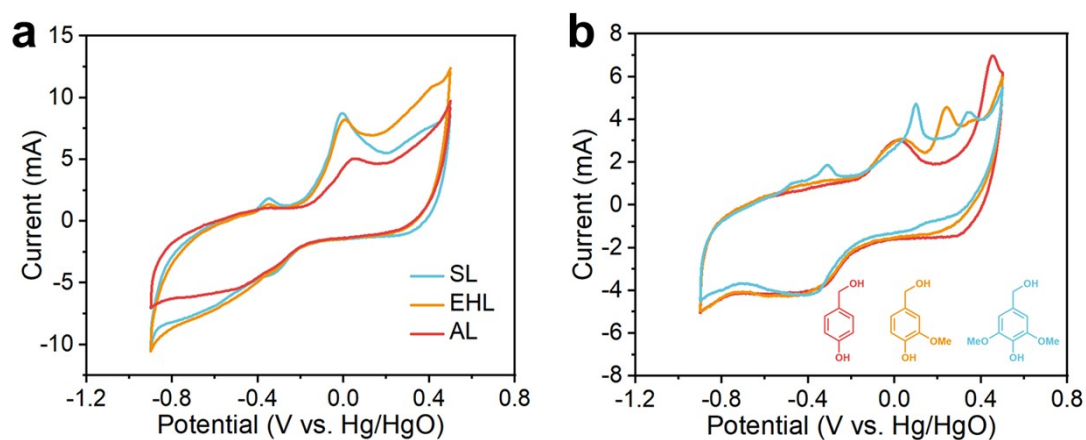

**Fig. S1.** (a) CV curves of sodium lignosulfonate (SL), enzymatic hydrolysis lignin (EHL) and alkali lignin (AL) in 1 M NaOH solution with 5 g L<sup>-1</sup> lignin. (b) CV curves of 4-hydroxybenzyl alcohol, 4-hydroxy-3-methoxybenzyl alcohol and 4-hydroxy-3,5-dimethoxybenzyl alcohol in 1 M NaOH solution with 10 mM lignin model compounds.

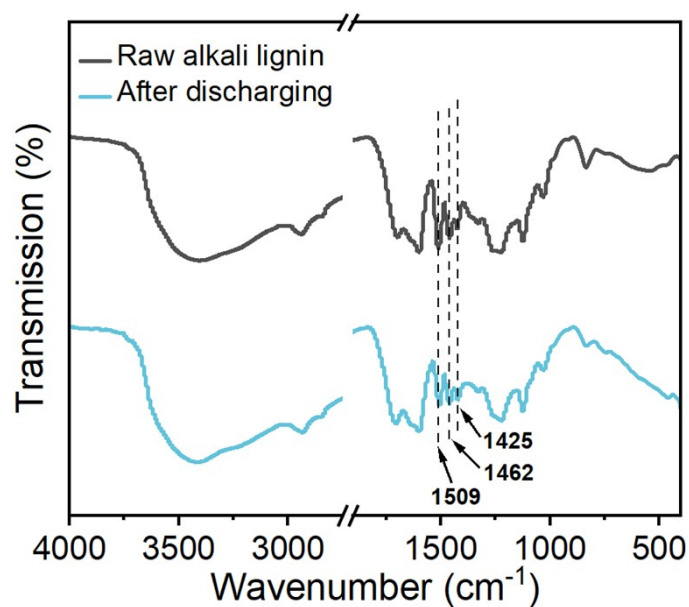

**Fig. S2.** FTIR spectra of alkali lignin before and after discharging for 4h.

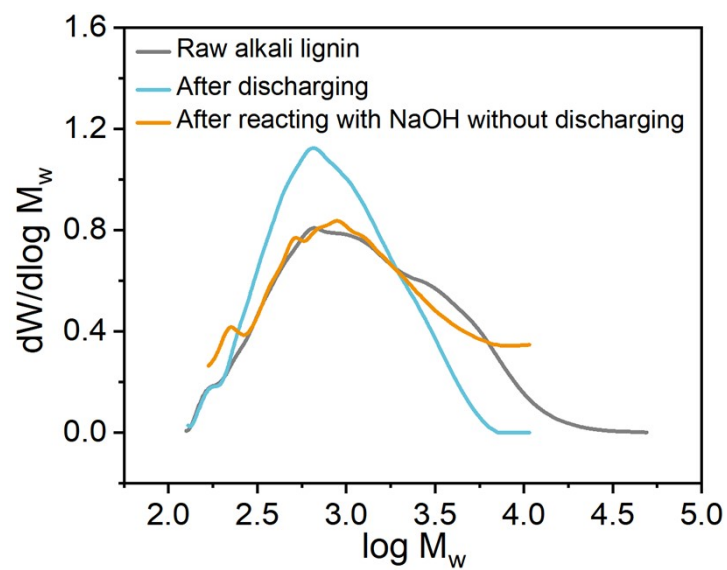

**Fig. S3.** Molecular weight distribution curves of raw alkali lignin, alkali lignin after discharging for 4h, and alkali lignin after reacting with NaOH solution before discharging.

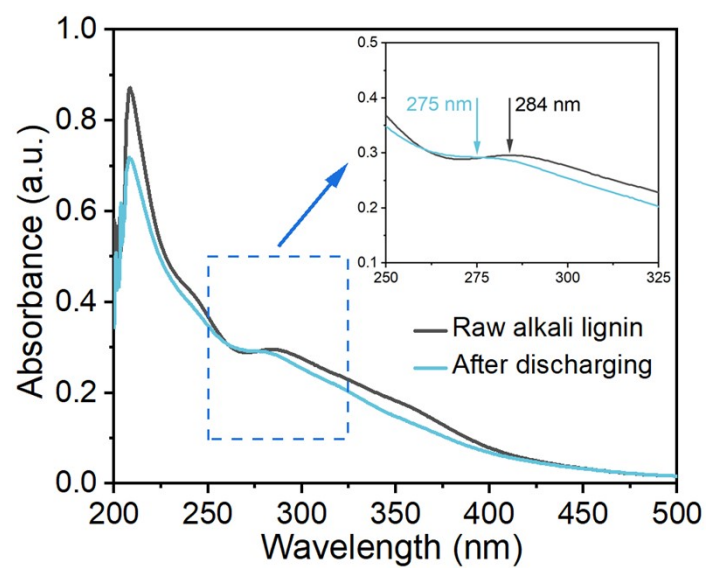

**Fig. S4.** UV-vis absorbance spectra of alkali lignin before and after discharging for 4h.

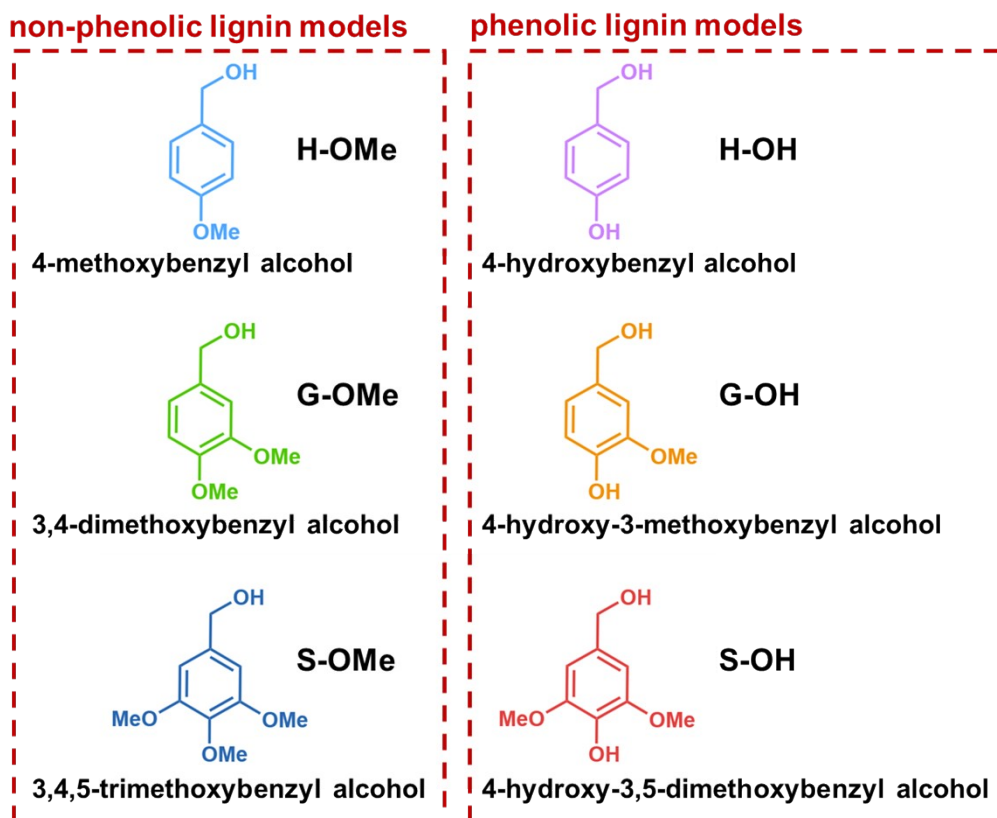

Fig. S5. Selected non-phenolic and phenolic lignin model compounds.

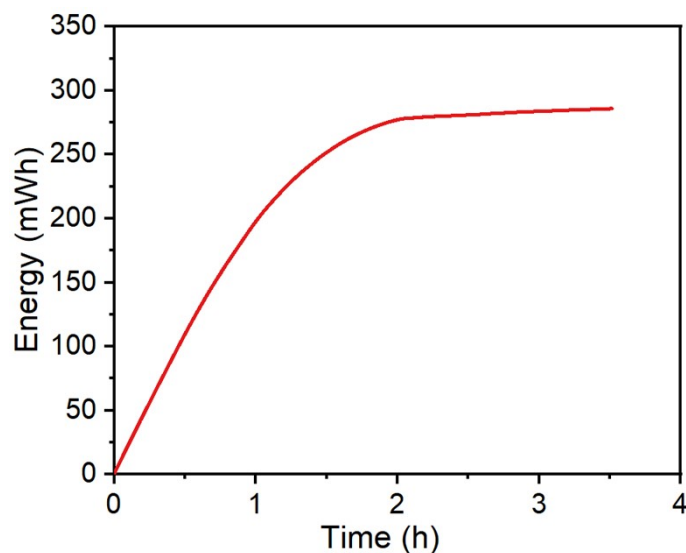

Fig. S6. Quantitative analysis of electricity generation from 4-hydroxy-3,5-dimethoxybenzyl alcohol (S-OH). Output energy of the LFFC tested by the constant-voltage (0.3V) discharging method (50 mL solution containing 0.5 g S-OH and 2 mol L<sup>-1</sup> NaOH).

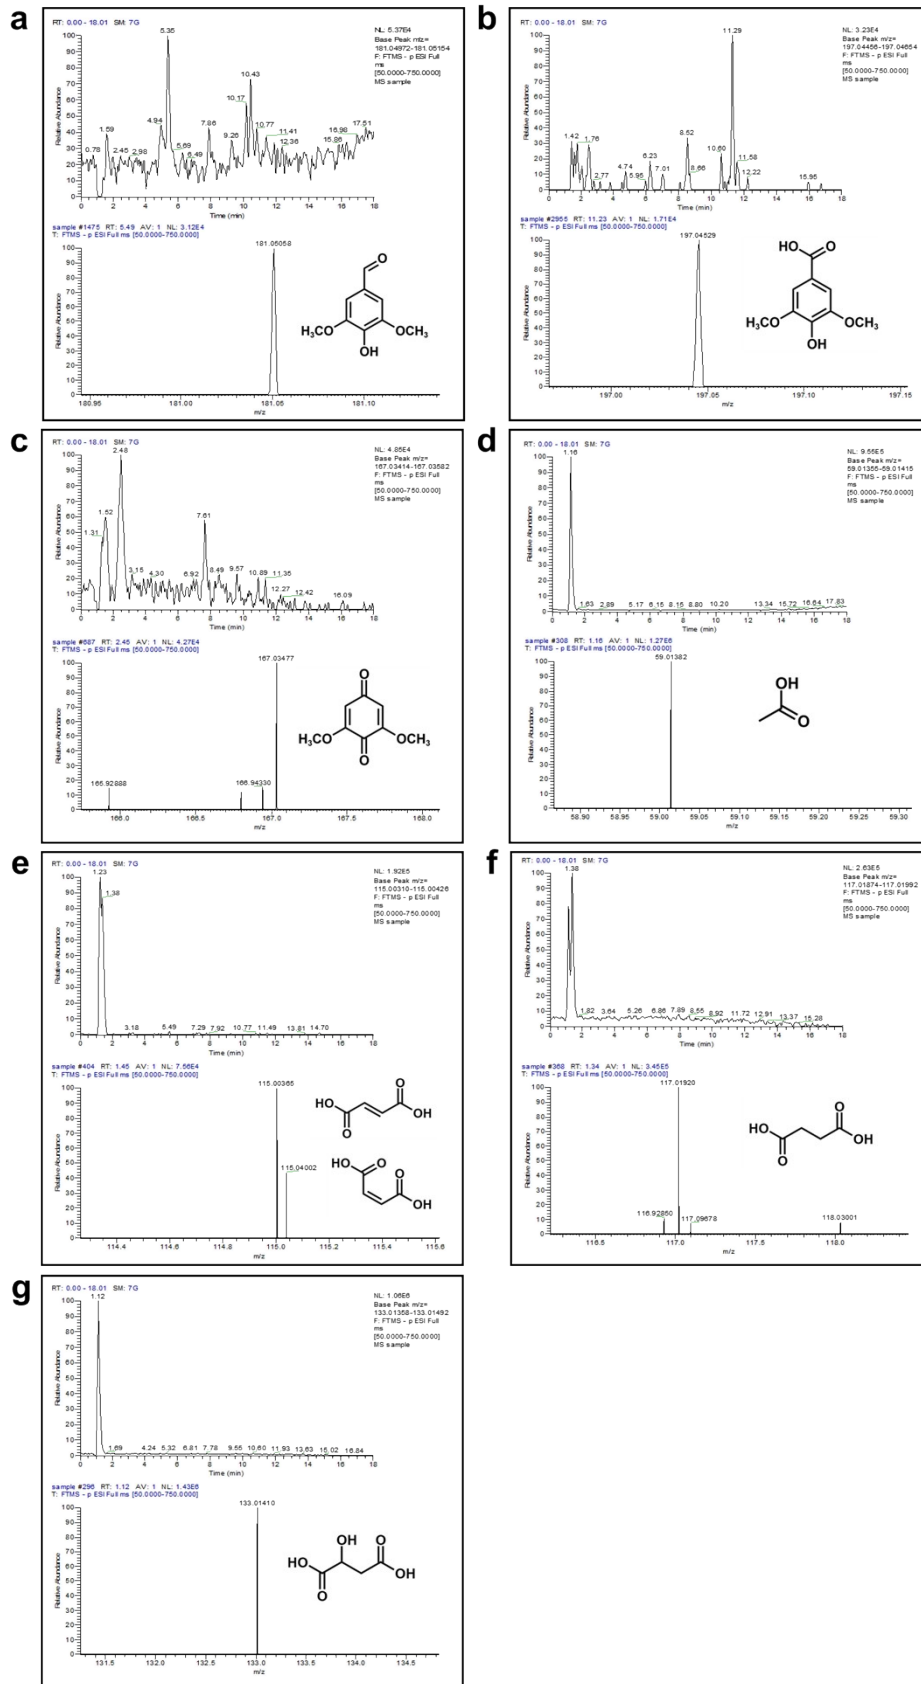

**Fig. S7.** HPLC-MS analysis of the liquid products when S-OH was discharged for 3.5 h at 90°C (50 mL solution containing 0.5 g S-OH and 2 mol L<sup>-1</sup> NaOH).

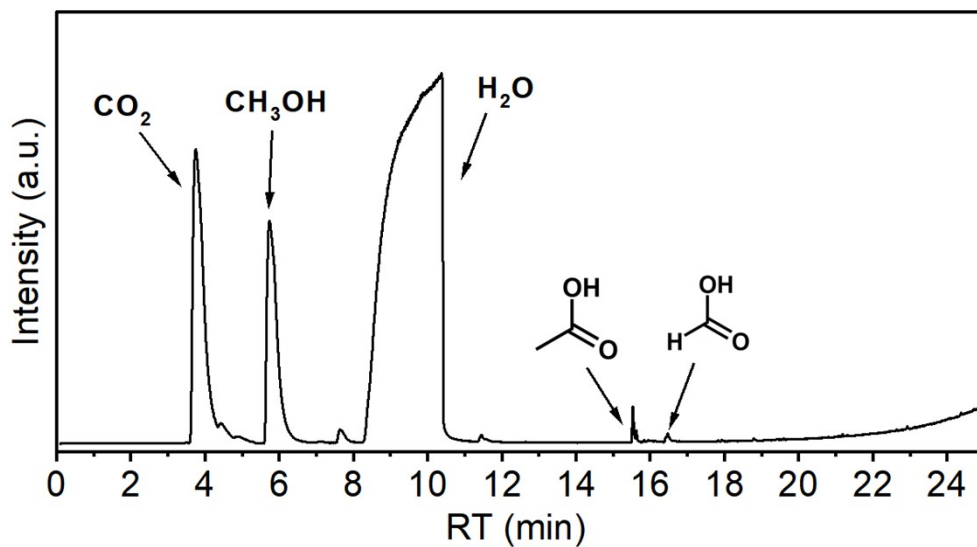

**Fig. S8.** HS-GC-MS analysis of the liquid products when S-OH was discharged for 3.5 h at 90°C (50 mL solution containing 0.5 g S-OH and 2 mol L<sup>-1</sup> NaOH).

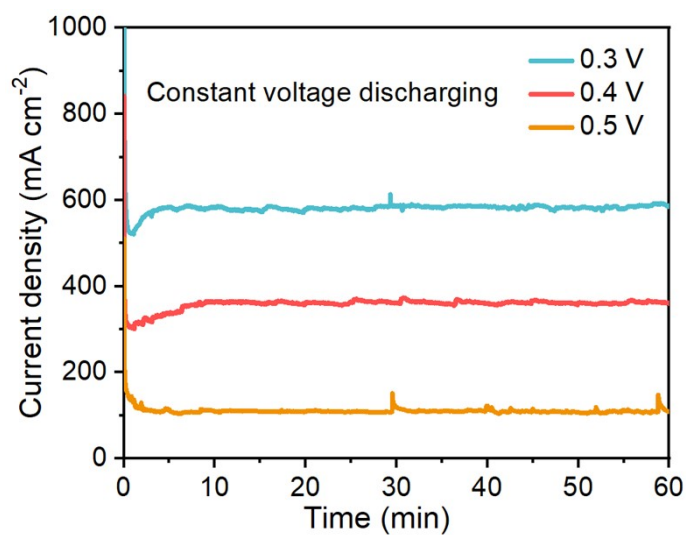

**Fig. S9.** Continuous discharge performance of the LFFC fueled by alkali lignin at different constant voltages.

## Supplementary Tables

**Table S1.** The NMR assignments of major signals in 2D-HSQC NMR spectra of alkali lignin samples.

| Label                                      | $\delta_C/\delta_H$ (ppm) | Assignments                                                                                                                |
|--------------------------------------------|---------------------------|----------------------------------------------------------------------------------------------------------------------------|
| -OCH <sub>3</sub>                          | 56.4/3.70                 | C-H in methoxyls                                                                                                           |
| A <sub><math>\alpha</math></sub>           | 71.6/4.86                 | C <sub><math>\alpha</math></sub> -H <sub><math>\alpha</math></sub> in $\beta$ -O-4 substructures (A)                       |
| A <sub><math>\beta</math></sub>            | 86.9/4.11                 | C <sub><math>\beta</math></sub> -H <sub><math>\beta</math></sub> in $\beta$ -O-4 substructures (A)                         |
| A <sub><math>\gamma</math></sub>           | 59.9/3.60                 | C <sub><math>\gamma</math></sub> -H <sub><math>\gamma</math></sub> in $\beta$ -O-4 substructures (A)                       |
| B <sub><math>\alpha</math></sub>           | 87.5/5.56                 | C <sub><math>\alpha</math></sub> -H <sub><math>\alpha</math></sub> in phenylcoumaran substructures (B)                     |
| B <sub><math>\gamma</math></sub>           | 62.3/3.76                 | C <sub><math>\gamma</math></sub> -H <sub><math>\gamma</math></sub> in phenylcoumaran substructures (B)                     |
| C <sub><math>\alpha</math></sub>           | 85.1/4.45                 | C <sub><math>\alpha</math></sub> -H <sub><math>\alpha</math></sub> in $\beta$ - $\beta$ resinol substructures (C)          |
| C <sub><math>\gamma</math></sub>           | 70.7/3.45                 | C <sub><math>\gamma</math></sub> -H <sub><math>\gamma</math></sub> in $\beta$ - $\beta$ resinol substructures (C)          |
| SD                                         | 82.1/4.92                 | C-H in $\beta$ -1 spirodienone substructures (SD)                                                                          |
| Gly <sub><math>\beta</math></sub>          | 75.5/3.48                 | C <sub><math>\beta</math></sub> -H <sub><math>\beta</math></sub> in arylglycerol substructures (Gly)                       |
| Gly <sub><math>\gamma</math></sub>         | 62.7/3.16-3.46            | C <sub><math>\gamma</math></sub> -H <sub><math>\gamma</math></sub> in arylglycerol substructures (Gly)                     |
| S <sub>2,6</sub>                           | 104.5/6.72                | C <sub>2,6</sub> -H <sub>2,6</sub> in syringyl units (S)                                                                   |
| S' <sub>2,6</sub>                          | 106.3/7.28                | C <sub>2,6</sub> -H <sub>2,6</sub> in oxidized syringyl units (S')                                                         |
| G <sub>2</sub>                             | 111.0/6.99                | C <sub>2</sub> -H <sub>2</sub> in guaiacyl units (G)                                                                       |
| G' <sub>2</sub>                            | 112.1/7.38                | C <sub>2</sub> -H <sub>2</sub> in guaiacyl units (G')                                                                      |
| G <sub>5</sub>                             | 115.3/6.68                | C <sub>5</sub> -H <sub>5</sub> in guaiacyl units (G)                                                                       |
| G <sub>6</sub>                             | 119.1/6.75                | C <sub>6</sub> -H <sub>6</sub> in guaiacyl units (G)                                                                       |
| H <sub>2,6</sub>                           | 128.7/7.23                | C <sub>2,6</sub> -H <sub>2,6</sub> in <i>p</i> -hydroxyphenyl units (H)                                                    |
| FA <sub>2</sub>                            | 111.3/7.25                | C <sub>2</sub> -H <sub>2</sub> in ferulate (FA)                                                                            |
| FA <sub>6</sub>                            | 122.3/7.12                | C <sub>6</sub> -H <sub>6</sub> in ferulate (FA)                                                                            |
| FA <sub><math>\alpha</math></sub>          | 144.6/7.45                | C <sub><math>\alpha</math></sub> -H <sub><math>\alpha</math></sub> in ferulate (FA)                                        |
| FA <sub><math>\beta</math></sub>           | 116.9/6.39                | C <sub><math>\beta</math></sub> -H <sub><math>\beta</math></sub> in ferulate (FA)                                          |
| <i>p</i> CA <sub>2,6</sub>                 | 130.3/7.49                | C <sub>2,6</sub> -H <sub>2,6</sub> in <i>p</i> -coumaroylated substructures ( <i>p</i> CA)                                 |
| <i>p</i> CA <sub><math>\alpha</math></sub> | 144.6/7.45                | C <sub><math>\alpha</math></sub> -H <sub><math>\alpha</math></sub> in <i>p</i> -coumaroylated substructures ( <i>p</i> CA) |
| <i>p</i> CA <sub>3,5</sub>                 | 116.9/6.39                | C <sub>3,5</sub> -H <sub>3,5</sub> in <i>p</i> -coumaroylated substructures ( <i>p</i> CA)                                 |
| <i>p</i> CA <sub><math>\beta</math></sub>  | 116.9/6.39                | C <sub><math>\beta</math></sub> -H <sub><math>\beta</math></sub> in <i>p</i> -coumaroylated substructures ( <i>p</i> CA)   |

**Table S2.** Molecular weight of lignin.

| Samples                                              | Mw (g/mol) | Mn (g/mol) | PDI    |
|------------------------------------------------------|------------|------------|--------|
| Raw alkali lignin                                    | 2257       | 777        | 2.9048 |
| After reacting with NaOH solution before discharging | 2018       | 733        | 2.7531 |
| After discharging                                    | 1143       | 632        | 1.8085 |

**Table S3.** Hydroxyl group content of alkali lignin before and after discharging.

| Samples                | Aliphatic OH | C <sub>5</sub> -substituted OH |             | Guaiacyl OH | p-Hydroxyphenyl OH | Total phenolic OH | Carboxylic acid OH |
|------------------------|--------------|--------------------------------|-------------|-------------|--------------------|-------------------|--------------------|
|                        |              | Condensed OH                   | Syringyl OH |             |                    |                   |                    |
| Raw alkali lignin      | 1.33         | 0.14                           | 0.21        | 0.44        | 0.34               | 1.13              | 0.08               |
| After discharging (4h) | 0.53         | 0.18                           | 0.12        | 0.33        | 0.16               | 0.79              | 0.54               |

Note: The hydroxyl group content was determined by <sup>31</sup>P NMR.

**Table 4.** Hydroxyl group content of different types of lignin.

| Samples | Aliphatic OH | C <sub>5</sub> -substituted OH |             | Guaiacyl OH | p-Hydroxyphenyl OH | Total phenolic OH | Carboxylic acid OH |
|---------|--------------|--------------------------------|-------------|-------------|--------------------|-------------------|--------------------|
|         |              | Condensed OH                   | Syringyl OH |             |                    |                   |                    |
| AL      | 1.33         | 0.14                           | 0.21        | 0.44        | 0.34               | 1.13              | 0.08               |
| EHL     | 1.52         | 0.48                           | 0.35        | 0.39        | 0.43               | 1.65              | 0.37               |
| SL      | 1.45         | 0.32                           | 0.01        | 0.44        | 0.15               | 0.92              | 3.26               |

Note: The hydroxyl group content was determined by <sup>31</sup>P NMR.

**Table S5.** Comparison of the generated electric energy (based on 1.0g biomass) of different biomass flow fuel cells.

| Fuel cell types | Fuels in anode half-cell | Electron mediators in anolyte         | Electron mediators in catholyte                 | External processing or pretreatment                             | Electric energy (mWh) | Ref.      |
|-----------------|--------------------------|---------------------------------------|-------------------------------------------------|-----------------------------------------------------------------|-----------------------|-----------|
| BFFC            | Wheat straw              | PMo <sub>9</sub> V <sub>3</sub>       | FeCl <sub>3</sub>                               | The suspension was heated in an autoclave at 120 °C for 1 h.    | 24.6                  | 1         |
| BFFC            | Sugarcane bagasse        | FeCl <sub>3</sub>                     | FeCl <sub>3</sub>                               | The suspension was heated in an autoclave at 120 °C for 30 min. | 101.4                 | 2         |
| BFFC            | Sugarcane bagasse        | K <sub>3</sub> [Fe(CN) <sub>6</sub> ] | FeCl <sub>3</sub>                               | The suspension was heated in an autoclave at 120 °C for 30 min. | 28.9                  | 2         |
| BFFC            | Sodium lignosulfonate    | CuCl <sub>2</sub> /TiOSO <sub>4</sub> | (VO <sub>2</sub> ) <sub>2</sub> SO <sub>4</sub> | The solution was heated to 90°C under stirring to react 1 h.    | 116.24                | 3         |
| LFFC            | Alkali lignin            | None                                  | (VO <sub>2</sub> ) <sub>2</sub> SO <sub>4</sub> | None                                                            | 219.9                 | This work |



**Table S6.** Comparison of the discharge performance of different biomass flow fuel cells.

| Fuel cell types | Fuels in anode half-cell           | Electron mediators in anolyte                                         | Electron mediators in catholyte                                                         | External processing or pretreatment                                                                      | Open-circuit voltage (V) | Peak power Density ( $P_{max}$ , mW/cm <sup>2</sup> ) | Ref.             |
|-----------------|------------------------------------|-----------------------------------------------------------------------|-----------------------------------------------------------------------------------------|----------------------------------------------------------------------------------------------------------|--------------------------|-------------------------------------------------------|------------------|
| BFFC            | Wheat straw                        | PMo <sub>9</sub> V <sub>3</sub>                                       | FeCl <sub>3</sub>                                                                       | The suspension was heated in an autoclave at 120 °C for 1 h.                                             | 0.44                     | 44.7                                                  | 1                |
| BFFC            | Sugarcane bagasse                  | K <sub>3</sub> [Fe(CN) <sub>6</sub> ]                                 | FeCl <sub>3</sub>                                                                       | The suspension was heated in an autoclave at 120 °C for 30 min.                                          | 0.78                     | 75.4                                                  | 2                |
| BFFC            | Sodium lignosulfonate              | CuCl <sub>2</sub> /TiOSO <sub>4</sub>                                 | (VO <sub>2</sub> ) <sub>2</sub> SO <sub>4</sub>                                         | The solution was heated to 90°C under stirring to react 1 h.                                             | 0.58                     | 55.1                                                  | 3                |
| BFFC            | Cellulose                          | H <sub>3</sub> PMo <sub>12</sub> O <sub>40</sub> (PMo <sub>12</sub> ) | Pt (60%)/C catalyst                                                                     | The solution was irradiated by simulated sunlight and heated on a hotplate up to 95 °C and kept for 6 h. | 0.38                     | 0.72                                                  | 4                |
| BFFC            | Raffinose                          | H <sub>3</sub> PMo <sub>12</sub> O <sub>40</sub> (POM-I)              | H <sub>12</sub> P <sub>3</sub> Mo <sub>18</sub> V <sub>7</sub> O <sub>85</sub> (POM-II) | The solution was irradiated with simulated sunlight for 8 h.                                             | 0.51                     | 45                                                    | 5                |
| BFFC            | Wheat straw                        | FeCl <sub>3</sub>                                                     | (VO <sub>2</sub> ) <sub>2</sub> SO <sub>4</sub>                                         | The suspension was heated to reflux at 100 °C under stirring for 20 h.                                   | 0.61                     | 100                                                   | 6                |
| BFFC            | Wheat straw                        | Methylene blue (MB)                                                   | FeCl <sub>3</sub>                                                                       | The suspension was heated in an oil bath at 90-105 °C.                                                   | 1.56                     | 41.8                                                  | 7                |
| BFFC            | Sodium lignosulfonate              | K <sub>3</sub> [Fe(CN) <sub>6</sub> ]                                 | (VO <sub>2</sub> ) <sub>2</sub> SO <sub>4</sub>                                         | The solution was heated at 105°C for 5 h.                                                                | 1.00                     | 23.0                                                  | 8                |
| BFFC            | Corn stover alkaline lignin        | K <sub>3</sub> [Fe(CN) <sub>6</sub> ]                                 | (VO <sub>2</sub> ) <sub>2</sub> SO <sub>4</sub>                                         | The solution was heated at 120°C for 30 min.                                                             | 1.15                     | 139.9                                                 | 9                |
| <b>LFFC</b>     | <b>Enzymatic hydrolysis lignin</b> | <b>None</b>                                                           | <b>(VO<sub>2</sub>)<sub>2</sub>SO<sub>4</sub></b>                                       | <b>None</b>                                                                                              | <b>1.67</b>              | <b>159.9</b>                                          | <b>This work</b> |

## Supplementary References

1. H. Yang, Y. Bai, D. Ouyang, F. Wang, D. Liu and X. Zhao, *J. Energy Chem.*, 2021, **58**, 133-146.
2. D. Ouyang, Y. Han, F. Wang and X. Zhao, *Bioresour. Technol.*, 2022, **344**, 126189.
3. C. She, X. Zu, Z. Yang, L. Chen, Z. Xie, H. Yang, D. Yang, G. Yi, Y. Qin and X. Lin, *Chem. Eng. J.*, 2023, **452**, 139266.
4. W. Liu, W. Mu, M. Liu, X. Zhang, H. Cai and Y. Deng, *Nat. Commun.*, 2014, **5**, 3208.
5. W. Liu, Y. Gong, W. Wu, W. Yang, C. Liu, Y. Deng and Z. s. Chao, *ChemSusChem*, 2018, **11**, 2229-2238.
6. J. Gong, W. Liu, X. Du, C. Liu, Z. Zhang, F. Sun, L. Yang, D. Xu, H. Guo and Y. Deng, *ChemSusChem*, 2017, **10**, 506-513.
7. Y.-A. Chen, H. Yang, D. Ouyang, T. Liu, D. Liu and X. Zhao, *Appl. Catal., B*, 2020, **265**, 118578.
8. D. Ouyang, F. Wang, H. Yang and X. Zhao, *Chem. Eng. J.*, 2021, **420**, 129716.
9. F. Wang, D. Ouyang, B. Li, T. Liu and X. Zhao, *Energy Convers. Manage.*, 2022, **258**, 115552.
